# Supplementary material for: Synthesis, characterization and crystal structure of a new mixed alkali and alkaline-earth metal borate Rb9Ba24(BO3)19
Source: Royal Society of Chemistry journal article supplement (doi:10.1039/c9nj06320j), 2020-01-01
Supplement: c9nj06320j1.pdf [file c9nj06320j1.pdf]

**Electronic Supporting Information**

**Synthesis, characterization and crystal structure of a new mixed alkali and  
alkaline-earth metal borate  $\text{Rb}_9\text{Ba}_{24}(\text{BO}_3)_{19}$**

Xiaowen Niu,<sup>a</sup> and Li Wang<sup>\*,a</sup>

*<sup>a</sup>College of Chemistry and Chemical Engineering, Xinjiang Normal University, Urumqi, Xinjiang  
830054, China*

*\*Corresponding author, E-mail: wangliresearch@163.com.*

**Table S1.** Atomic coordinates ( $\times 10^4$ ), equivalent isotropic displacement parameters ( $\text{\AA}^2 \times 10^3$ ) and bond valence sums (BVS) calculation for  $\text{Rb}_9\text{Ba}_{24}(\text{BO}_3)_{19}$ .

| Atoms | $x$     | $y$     | $z$      | $U(\text{eq})$ | BVS |
|-------|---------|---------|----------|----------------|-----|
| Ba(1) | 4375(1) | 5625(1) | 3539(1)  | 12(1)          | 1.8 |
| Ba(2) | 3032(1) | 3032(1) | 5000     | 9(1)           | 2.2 |
| Ba(3) | 0       | 3644(1) | 0        | 10(1)          | 2.3 |
| Ba(4) | 1130(1) | 2260(1) | 1578(1)  | 16(1)          | 2.1 |
| Rb(1) | 0       | 0       | 5000     | 90(2)          | 0.9 |
| Rb(2) | 4668(1) | 2334(1) | 2062(2)  | 36(1)          | 0.8 |
| Rb(3) | 3333    | 6667    | 905(3)   | 39(1)          | 0.7 |
| B(1)  | 2216(4) | 4433(7) | 2833(14) | 10(2)          | 2.9 |
| B(2)  | 5443(4) | 4557(4) | 2189(14) | 10(2)          | 2.8 |
| B(3)  | 2532(7) | 1266(4) | 2757(15) | 13(2)          | 2.9 |
| B(4)  | 0       | 0       | 0        | 40(1)          | /   |
| O(1)  | 2633(3) | 5266(5) | 3643(11) | 27(2)          | 1.9 |
| O(2)  | 2703(3) | 3999(3) | 2405(6)  | 13(1)          | 2.0 |
| O(3)  | 4647(3) | 3952(3) | 3118(6)  | 16(1)          | 2.0 |
| O(4)  | 5604(3) | 4396(3) | 422(9)   | 22(2)          | 1.7 |
| O(5)  | 2644(3) | 2026(3) | 1806(6)  | 15(1)          | 2.0 |
| O(6)  | 2412(5) | 1206(3) | 4621(8)  | 20(2)          | 1.8 |
| O(7)  | 712(17) | 356(9)  | 1080(40) | 106(10)        | 1.7 |

Note: The BVS for the B(4) atom which is coordinated with disordered O(7) atoms was not calculated.

**Table S2.** Selected bond lengths (Å) and angles (°) for Rb<sub>9</sub>Ba<sub>24</sub>(BO<sub>3</sub>)<sub>19</sub>.

| Rb <sub>9</sub> Ba <sub>24</sub> B <sub>19</sub> O <sub>54</sub> |           |                     |           |
|------------------------------------------------------------------|-----------|---------------------|-----------|
| Rb(1)-O(7)#1                                                     | 3.040(3)  | Ba(2)-O(6)#1        | 2.745(3)  |
| Rb(1)-O(7)#2                                                     | 3.040(3)  | Ba(2)-O(3)          | 2.749(5)  |
| Rb(1)-O(7)#3                                                     | 3.040(3)  | Ba(2)-O(3)#16       | 2.749(5)  |
| Rb(1)-O(7)#4                                                     | 3.040(3)  | Ba(2)-O(5)          | 2.764(4)  |
| Rb(1)-O(7)                                                       | 3.040(3)  | Ba(2)-O(5)#16       | 2.764(4)  |
| Rb(1)-O(7)#5                                                     | 3.040(3)  | Ba(3)-O(2)#13       | 2.636(4)  |
| Rb(1)-O(6)#4                                                     | 3.557(8)  | Ba(3)-O(2)#18       | 2.636(4)  |
| Rb(1)-O(6)#3                                                     | 3.557(8)  | Ba(3)-O(3)#18       | 2.727(4)  |
| Rb(1)-O(6)#1                                                     | 3.557(8)  | Ba(3)-O(3)#13       | 2.727(4)  |
| Rb(1)-O(6)#2                                                     | 3.557(8)  | Ba(3)-O(5)#13       | 2.738(5)  |
| Rb(1)-O(6)                                                       | 3.557(8)  | Ba(3)-O(5)#18       | 2.738(5)  |
| Rb(1)-O(6)#5                                                     | 3.557(8)  | Ba(3)-O(4)#11       | 2.923(5)  |
| Rb(2)-O(3)                                                       | 2.870(5)  | Ba(3)-O(4)#13       | 2.923(5)  |
| Rb(2)-O(3)#6                                                     | 2.870(5)  | Ba(4)-O(6)#1        | 2.777(6)  |
| Rb(2)-O(5)#6                                                     | 3.212(5)  | Ba(4)-O(5)          | 2.795(5)  |
| Rb(2)-O(5)                                                       | 3.212(5)  | Ba(4)-O(5)#18       | 2.796(5)  |
| Rb(2)-O(1)#4                                                     | 3.249(8)  | Ba(4)-O(5)#9        | 2.796(4)  |
| Rb(2)-O(4)                                                       | 3.263(5)  | Ba(4)-O(5)#13       | 2.796(4)  |
| Rb(2)-O(4)#7                                                     | 3.263(5)  | Ba(4)-O(2)#18       | 2.886(4)  |
| Rb(2)-O(2)#8                                                     | 3.602(5)  | Ba(4)-O(2)          | 2.886(4)  |
| Rb(2)-O(2)#9                                                     | 3.602(5)  | Ba(4)-O(7)          | 2.964(6)  |
| Rb(3)-O(1)#11                                                    | 2.866(8)  | Ba(4)-O(7)#3        | 2.964(6)  |
| Rb(3)-O(1)                                                       | 2.866(8)  | Ba(4)-O(7)#13       | 2.990(3)  |
| Rb(3)-O(1)#12                                                    | 2.866(8)  | B(1)-O(1)           | 1.360(13) |
| Rb(3)-O(4)#10                                                    | 3.272(7)  | B(1)-O(2)#18        | 1.389(7)  |
| Rb(3)-O(4)#13                                                    | 3.272(7)  | B(1)-O(2)           | 1.389(7)  |
| Rb(3)-O(4)#14                                                    | 3.272(7)  | B(2)-O(4)           | 1.371(12) |
| Ba(1)-O(1)#12                                                    | 2.706(16) | B(2)-O(3)#17        | 1.396(7)  |
| Ba(1)-O(1)                                                       | 2.706(17) | B(2)-O(3)           | 1.396(7)  |
| Ba(1)-O(3)#15                                                    | 2.829(4)  | B(3)-O(6)           | 1.369(12) |
| Ba(1)-O(3)#16                                                    | 2.829(4)  | B(3)-O(5)#6         | 1.391(7)  |
| Ba(1)-O(4)#10                                                    | 2.886(6)  | B(3)-O(5)           | 1.391(7)  |
| Ba(1)-O(2)#17                                                    | 2.920(4)  | B(4)-O(7)#20        | 1.310(3)  |
| Ba(1)-O(2)                                                       | 2.920(4)  | B(4)-O(7)#8         | 1.310(3)  |
| Ba(1)-O(3)#17                                                    | 3.112(5)  | B(4)-O(7)#3         | 1.310(3)  |
| Ba(1)-O(3)                                                       | 3.112(5)  | B(4)-O(7)#2         | 1.310(3)  |
| Ba(2)-O(2)#16                                                    | 2.738(4)  | B(4)-O(7)#13        | 1.310(3)  |
| Ba(2)-O(2)                                                       | 2.738(4)  | B(4)-O(7)           | 1.310(3)  |
| Ba(2)-O(6)                                                       | 2.745(3)  |                     |           |
| O(1)-B(1)-O(2)#18                                                | 120.7(4)  | O(7)#20-B(4)-O(7)#2 | 92.2(18)  |
| O(1)-B(1)-O(2)                                                   | 120.7(4)  | O(7)#8-B(4)-O(7)#2  | 92.2(18)  |
| O(2)#18-B(1)-O(2)                                                | 118.5(8)  | O(7)#3-B(4)-O(7)#2  | 87.8(18)  |

|                     |          |                      |          |
|---------------------|----------|----------------------|----------|
| O(4)-B(2)-O(3)#17   | 121.6(4) | O(7)#20-B(4)-O(7)#13 | 87.8(18) |
| O(4)-B(2)-O(3)      | 121.6(4) | O(7)#8-B(4)-O(7)#13  | 87.8(18) |
| O(3)#17-B(2)-O(3)   | 116.8(8) | O(7)#3-B(4)-O(7)#13  | 92.2(18) |
| O(6)-B(3)-O(5)#6    | 120.6(4) | O(7)#2-B(4)-O(7)#13  | 180.0(2) |
| O(6)-B(3)-O(5)      | 120.6(4) | O(7)#20-B(4)-O(7)    | 180.0(3) |
| O(5)#6-B(3)-O(5)    | 118.4(8) | O(7)#8-B(4)-O(7)     | 92.2(18) |
| O(7)#20-B(4)-O(7)#8 | 87.8(18) | O(7)#3-B(4)-O(7)     | 87.8(18) |
| O(7)#20-B(4)-O(7)#3 | 92.2(18) | O(7)#2-B(4)-O(7)     | 87.8(18) |
| O(7)#8-B(4)-O(7)#3  | 180.0(3) | O(7)#13-B(4)-O(7)    | 92.2(18) |

Symmetry transformations used to generate equivalent atoms:

#1  $x-y, x, -z+1$     #2  $-x+y, -x, z$     #3  $-y, x-y, z$     #4  $y, -x+y, -z+1$     #5  $-x, -y, -z+1$     #6  $x, x-y, z$   
#7  $-y+1, x-y, z$     #8  $y, -x+y, -z$     #9  $y, x, -z$     #10  $-x+1, -y+1, -z$     #11  $-x+y, -x+1, z$     #12  $-y+1, x-y+1, z$   
#13  $x-y, x, -z$     #14  $y, -x+y+1, -z$     #15  $-x+1, -y+1, -z+1$     #16  $y, x, -z+1$     #17  $-y+1, -x+1, z$     #18  $-x+y, y, z$   
#19  $-x+y+1, -x+1, z$     #20  $-x, -y, -z$     #21  $x, y, z-1$

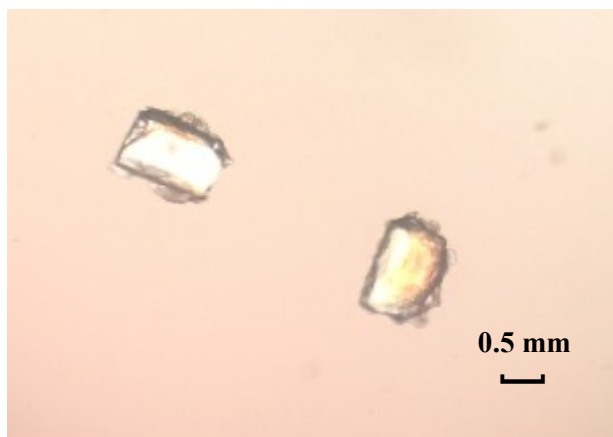

**Figure S1:** The crystal photo of  $\text{Rb}_9\text{Ba}_{24}(\text{BO}_3)_{19}$ .

**Table S3.** The Li<sup>+</sup>/Rb<sup>+</sup> substitution in a series of anhydrous mixed alkali and alkaline-earth metal borates space group and B-O configurations in the structures.

| Formula                                                                           | Space group                        | FBB                            | Refs      |
|-----------------------------------------------------------------------------------|------------------------------------|--------------------------------|-----------|
| LiMgBO <sub>3</sub>                                                               | <i>C2/c</i>                        | Isolated BO <sub>3</sub> units | S1        |
| RbMgBO <sub>3</sub>                                                               | <i>P2<sub>1</sub>3</i>             | Isolated BO <sub>3</sub> units | S2        |
| LiCaBO <sub>3</sub>                                                               | <i>Pbca</i>                        | Isolated BO <sub>3</sub> units | S3        |
| RbCaBO <sub>3</sub>                                                               | <i>P2<sub>1</sub>3</i>             | Isolated BO <sub>3</sub> units | S4        |
| Li <sub>2</sub> Rb <sub>7</sub> Sr <sub>24</sub> (BO <sub>3</sub> ) <sub>19</sub> | <i>P<sup>-</sup><sub>3</sub>m1</i> | Isolated BO <sub>3</sub> units | S5        |
| Rb <sub>9</sub> Ba <sub>24</sub> (BO <sub>3</sub> ) <sub>19</sub>                 | <i>P<sup>-</sup><sub>3</sub>m1</i> | Isolated BO <sub>3</sub> units | This work |

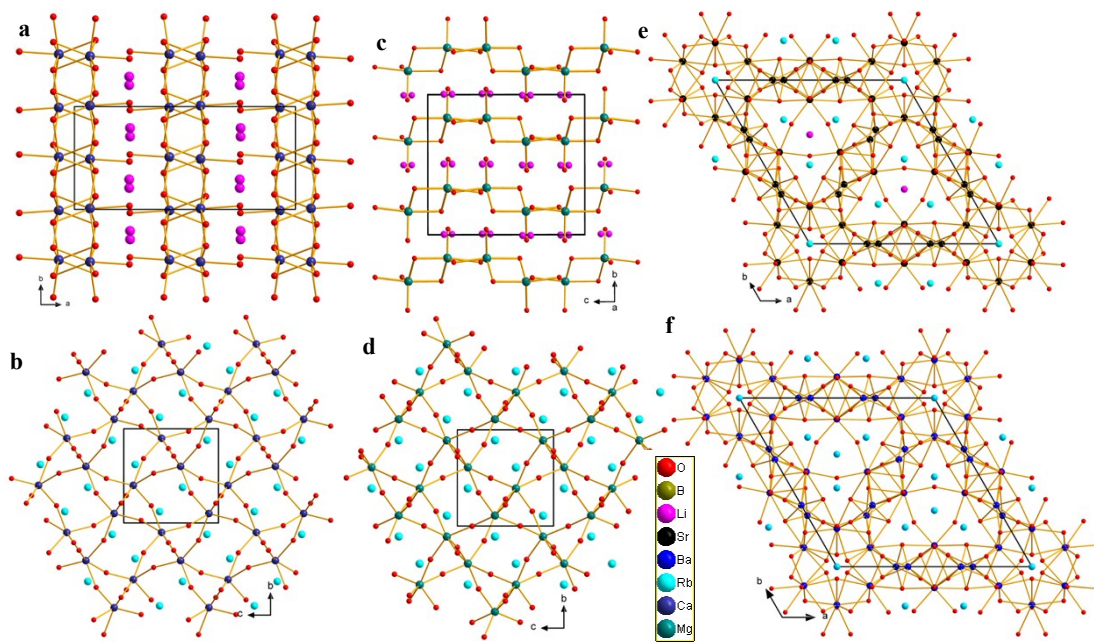

**Figure S2.** Crystal structures of (a) LiCaBO<sub>3</sub>, (b) RbCaBO<sub>3</sub>, (c) LiMgBO<sub>3</sub>, (d) RbMgBO<sub>3</sub>, (e) Li<sub>2</sub>Rb<sub>7</sub>Sr<sub>24</sub>(BO<sub>3</sub>)<sub>19</sub>, (f) Rb<sub>9</sub>Ba<sub>24</sub>(BO<sub>3</sub>)<sub>19</sub>.

## References

- S1 R. Norrestam, *Z Krist.-Cryst. Mater.*, 1989, **187**, 103.
- S2 (a) R. V. Kurbatov, L. A. Solovyov, B. G. Bazarov, A. K. Subanakov and J. G. Bazarova, *Solid State Commun.*, 2013, **172**, 33. (b) Z. Wang, M. Zhang, S. L. Pan, Z. H. Yang, H. Zhang, B. B. Zhang, Y. Wang, J. Kang and X. X. Lin, *New J. Chem.*, 2014, **38**, 3035.
- S3 L. Wu, X. L. Chen, H. Li, M. He, L. Dai, X. Z. Li and Y. P. Xu, *Solid State Commun.*, 2004, **177**, 1111.
- S4 M. Wen, H. P. Wu, X. Su, J. J. Lu, Z. H. Yang, X. H. Wu and S. L. Pan, *Dalton. Trans.*, 2017, **46**, 15, 4968.
- S5 R. R. Ma, Y. Yang, C. Hu, Z. H. Yang and S. L. Pan, *Chem. Eur. J.*, 2018, **24**, 15355.
